# Supplementary material for: Genome-wide analysis and identification of nuclear factor Y gene family in switchgrass (Panicum virgatum L.)
Source: PubMed Central journal article supplement (PMC11661050; doi:10.1186/s12864-024-11092-6), 2024-12-20
Supplement: 12864_2024_11092_MOESM2_ESM.pdf [file 12864_2024_11092_MOESM2_ESM.pdf]

File S1

Protein sequences of PvNF-Ys and AtNF-Ys

>PvNF-YA01

MRSAAAMCFQEHGLAFQVVADGGRGHGGGATAAPWWATTAQGFAAKFPISFSSGSDPPQDHKYHEPSAAGMAAYPELHKYHGPFDLAFGQSMVWSNNAAGAGQRQSYGLYSPYGAQAMHGRVLLPPAVAAKEPVYVNAKQFKGILRRRLARARAARDLRASRNRKPYLHESRHLHALRRARGSGGRFLNTRSLAAGDPAPPGGPEPTEDSASKAATLHPVQDRQDVFHSSLTNMAGDGDGRWACAAPRRCRDLLKA

>PvNF-YA02

MPKLLREVEDHPVHPMSKSNHGFLSGNGHEMKHLGHKIHDKDSSSESGQSHQEAPAVSESSLNENTSTQSDNDEGHGKHNQDTEHSVLSMGKQGS AFLPPKLDYNPSFACLPTAD AYYGGVLPGYPPHAIIVHPQQNHTTNAPVMLPVEAAEEPIYVNAKQYHAILRRRQTRAKLEAQNKLKGRKPYLHESRHRHAMKRARGSGGRFLNNTKQLQEQQHQASGSSSS KFIGNSISSQSDPTPTPSTPASSDTASASRVNQDHNCFPSVGFPRPAMNFSAPGGDGAKLVS

>PvNF-YA03

MLLPSSSSSSASKGNSLRKTVIDNMRSTLSFENKQPLFASQAIDYQPIACISYPYNDSGSGGVWAAYGSRSSSTVFHPQIAGGGTSARIPLPLELAENEPIYVNPQYHGILRRRQFRAKLEAQNKLKARKPYLHESRHLHAMKRARGSGGRFLNNTKQLQQPRNASTRSTNGTASSSGSTHLRLGGGTARDQTM LAPKAMP SQYNSKKAVSSAPGFTVTPMLHRDDTFFQHP SHLSFSGHFGQASQAQAGMHNGTQQRVPV MR

>PvNF-YA04

MTSVVHSVSGDHRAEDQHQQQKQAVPEDQQEAPVTSSDSQPTVGTSPADYVAPYAPHDMGHALGQYAYPNIDPYGSLYAAAYGGQPMHPPLVGMHPTGLPLPTDAIEEPVYVNAKQYNAILRRRQSRAKAESERKLVKGRKPYLHESRHQHALKRARGAGGRFLNSKSDKEENS DSSHKEKQNGVAPHKSGQPSTPPSPNGASSANQADSRQ

>PvNF-YA05

MMSFRSHEGFGQVPAGATSNAAVPPWWAPAPQLLLYGDALGQGVKVPPEQAPCREARFQVVPGAQAPLGPVQPPAKAAAERGLPVLFKFSVAQKGEKGESEHSASVALPSPFAIYNGRFELGLGQSTVSVNSPYVDQHCGLISSYPVGAMPGGCMRIPLNMPTEAPIYVNAKQYEGILRRRRARAKAERENRLVKARKPYLHESRHLHALRRARGSGGRFLNNTKESNTKDAGGDGKAMFSNPLMRQVAPSPSEIQSDLDGNPSSVSSLSGSEVSSIYDHEDVDHFHFSDFHIRTFFFTPLPSIMDSEHG VGNPFKWPIASEGCCDLLRA

>PvNF-YA06

MLPPLHTENGTIMIQFGHQMPDYNPATQSTSESHQEVSVMSEGLNDHNDQSGNHDGYSKSDENKMMSALS LGNPETAYAHPKTDRSQSFAISYPYADSYGGAVAAYGQHAIQMHQPLVSMVSSSRVPLPIEPAEEPIYVNAKQYHAILRRRQLRAKLEAENKLVKSRKPYLHESRHLHAMKRARGTGGFRFLNNTKQSDSPGGTSDAQRMPANGGLFTKHEHSLPPGDRHYHARGGV

>PvNF-YA07

MMPSGNKMLLQEMDGDPFHTMQNYDFLSGNGYSMKQLIHSNSDKDSSSTKSEQRQDLSTVSDSSLNGQHTPTQSDNNDSCGKRDQGMVKTILSFGNPEVAFSTQKFDHSQPFACASYTADPYCGALTGYTSNAIVHPQINVAANSRVPLPIEPAEEPIFVNAKQYHAILRRRQMRRAKLEAQNKLKGRKPYLHESRHRHAMKRVRGPGGRFLNKKELQEQQQKALPSLQTPTGGAGKMALCRNNLCSSENSASHSSSTSSGISIVSNGGGMVAHHEHISFSTSLPGMNFHAENGGEKMAVHGVHRRTPS

>PvNF-YA08

MESRPGGTNLVEPRGQGAALPSGGAAMQKPWWTSSGAGLGAVSPAVVAPGSGAGISLSSSPVGGGGGGGAGAAKGAASDESEDSRRSGEPKDGSAQGEKNHATSQMPALMSEYLTPTYSQLELNQSIGSAAYQYDPYAGMIPPYGTQAVAHFQLPGLSHSRMPLPLEVSEEPVYVNAKQYHGILRRRQSRAKAELEKKVVKTRKPYLHESRHQHAMRRARGNGGRFLNNTKSDNGTPNGNAEPPKGDQNYEHLHVPDQLLRQNEA

>PvNF-YA09

MMSFKGHEGLGQVAAGSQASHVAAGAPLPWWAGPQLIYGEPAPLSPEETRRDGHFQVVPGAQGGTDPAPPAATKRGNEVLKFSVVFQGNLESQGGKGDKNPEHSTTIALQSPFPEYNGRFEIGLGQSMVPSNYSCDDQCYGLTTYGMRSMSGGRMMLPLNAPADAPIYVNPQYEGILRRRRARAKAERENRLAKGRKPYLHESRHLHAMRRARGSGGRFVNTKKEGGASANGASKTVSAAAPARLATSPTSTEPRRVPLGKGS DGSNPRCQSRSSVSSLSGSEVSSIYDDHASRHQYGGMEPHLRAPSFFTPLPAIMDGDHGGAAAIPSFKWAASDGCCELLKA

>PvNF-YA10

MRSAAAMGFQEHGLAFQVITDGGGGATAAPWWAAAAAPQGFAAKFPISSGSDPPQDLYHEPLAAAMAAYPELHKYHGPFDLALGQSMVWSNNAAGAGQRQSFGLYSPYGAQAMHGRVLLPPAIAAEEPVYVNAKQFKGILRRRLARARAARDLRASRNRKPYLHESRHLHALRRARGSGGRFLNTRSLAAGDPPPQLASTPLGGPEPTEGGASKAARLHPAKERQEDVFLSSLTNMAGDGDGKARWVGAAPRGCCDLLRA

>PvNF-YA11

MPKLLREVEDHPVHPMSKSNHGFLSGNDHEMKHLGHKIHDKDLSSESGQSHQEAPAVSESSLNENTSTQSDNDEGHGKHNQD TVHTVLSMGKQGS AFLPPKLDYNRSFACLPTAD AYYGGVLTGYPPHAVAHPQQNHTTNAPVMLPAEPAEEPIYVNAKQYHAILRRRQTRAKLEAQNKLKGRKPYLHESRHRHAMKRARGSGGRFLNNTKQLQQTQQHQASGSSSS KVIGNSISSQSDPTPAPSTSTPSDTASASRANQDRTCFPVGLRPAMNFSAPGGEGAKLVR

>PvNF-YA12

MLLPSSSSSSASKGNSLRKTAIDNMRSTLSFDNKQPVFASQGIDYQPIACISYPYNDSGSGGVWAAYGSRASAATVFHPQIAGGGTSARIPLPLELAENEPIYVNPQYHGILRRRQFRAKLEAQNKLKARKPYLHESRHLHAMKRARGSGGRFLNNTKQLQQQLRNASTRSTNGTSSSGSTHLRLGGGTARDQTM LAPKAMP PQDNSKKAVSSAPGLTQTMLRRDDTFFQHP SHLSFSGHFGQASQAQAGMHNGTQHRVPV MR

>PvNF-YA13

MLPPLHIENGTIMIQFGHQMPDYDSPATQSTSESHQEVSVMSEGLNDHNDQSGNHDGYSKSDENKMMSALS LGNPETAYAHPKPDRSQSFAISYPYADSYGGAVAAYGQHAIMHPQLVGMMPSSSRVPLPIEPAEEPIYVNAKQYHAILRRRQLRAKLEAENKLVKSRKPYLHESRHLHAMKRARGTSGRFLNNTKQSDSPGGSSDAQRMPANGGLFTKHEHSHPPGDRHYHARGGA

>PvNF-YA14

MMSFKGHEGLGQVAAGSQASHVAAGAPLPWWAGPQLLYGESAPLSPEETRRDQGFQVVPGAQGGTDPAPPAATKRGSEVLKFSVVFQGNLESQGGKGEKNPEHSTTIALQSPFPEYNGRFEIGLGQSMVPSNYSCDDQCYGLTTYGMRSMSGGRMMLPLNAPADAPIYVNPQYEGILRRRRARAKAERENRLAKGRKPYLHESRHLHAMRRARGSGGRFLNNTKKEGGGANANGAGKTVSARLATSPTSTEPPRVPELGKGNNGSNPRCHSRSSVSSLSGSEVTSIYDHHDDHASRHQYGGMEPHLRAPSFFTPLPAIMDGDHGGAAATIPSFKWVWASDGCCELLKA

>PvNF-YA15

MESRPDGTNLVEPRPGGAALPSGGAAMQQPWWTSSGAGLGAVAPAVVAPGSGAGISLSSSPVGS GGAGAAKGAASDESSGDSRRSGEPKDGSAQGEKNHATSQMPALMSEYLTPTYSQLELNQSIGSAAYQYDPYAGMIPPYGTQALAHFQLPGLSHSRMPLPLEVSEEPVYVNAKQYHGILRRRQSRAKAELEKKVVKTRKPYLHESRHQHAMRRARGNGGRFLNNTKSDNGTPNGNAEPPKGDQNSEHLRVPDQLLRQNEA

>PvNF-YA16

MMSFRSHEGFGQVPAGASSNGPAVPPWWAPAPQLLLYGEALGQGVKVPPEASPCREARFQVAPGAQAPLGPVPPPPPAKAAAERGLPEVLKFSVAQKGEKGS GHSAATAALPSPFAIYNGHFELGLGQSTVSANNLYVDQHCGLSPYPMGATPGGCMRIPLNMPTEAPIYVNAKQYEGILRRRRARAKAERENRLVKARKPYLHESRHLHALRRARGSGGRFLNNTKESNSKDAVGDGKAMFSNPLMRQVAPSPSEIQSDLDGNPSSVSSLSGSEVSSIYDHEDVDHYHSFDHLRTPFFFTPLPSIMDSEHG VGI PFKWPTASEGCCDLLRA

>PvNF-YA17

MTSVVHSVSGDHRAEDQHQQQQAEPEDQQEAPVTSSDSQPTVGTSPADYVTPYAPHDMAHAMGQYAYPNIDPYGSLYAAAYGGQPMMPHPLVGMHPTGLPLPTDAIEEPVYVN  
AKQYNAILRRRQSRKAESERKLVKGRKPYLHESRHQHALKRARGAGGRFLNSKPDDKEENSDDSHKEKQNGVAPHKSGQPSTPPSPNGASSANQADSHQ

>PvNF-YB01

MPDSDKESGWPSNAEFSSPREQDRFLPIANVSRIMKMALPANAKISKDAKETVQECVSEFISFITGEASDKCQREKRKTINGDDLLWAMTTLGFEDYIEPLKLYLHKFRELEGEKVASGA  
AGSSGSGSQPQRETTPSAHNGAGGAVGYGIYGAGAGAGGGSGMIMMMGQPMYNSPPGASGYPPPHHQMVMMAAKGGAYGHGGSSSPPLGRQDRL

>PvNF-YB02

MKSRKGYGGQQGHLLSPVGSPPSDNESGAAAAAGCGSSAGYAGGGDSPAKELDRFLPIANVSRIMKRSLPANAKISKEAKETVQECVSEFISFVTGEASDKCQREKRKTINGDDLLWA  
MTTLGFAYVGPLKSYLNRYREAEGEKA AVGGARHGDGADEGPLGAGAVAAAAADRAGHHDAGGSMDVGLLMGVGAGGFGAGGGTSSYSAAAGRAYGGDGSKVLEFDGE  
EENGRGMQRGFGAGHLHGAVQL

>PvNF-YB03

MSTDPQGPKPAPCAMPPEHA AVAKEAMVTEPLVPSTEPVMIREQDRLLPVANVSRIMRHALPPHAKISDDAKEMIQDCVSEFISFVTGEANERCHTEHRKTVTAEDLVWAMNRLGF  
DDYVRPLNAFLQRMREIEGGGSGRGRSRRGSSLVALQGAQTLRPAYPDAPQGYAVRPVPRPVVPASSVASRFGSRHLQLPGGQRSMVPYGGAAAFRAVGSHGGFYADEASSSDEAPP  
AARRA

GSRRY

>PvNF-YB04

MADAPASPGGGGGSHESGSPRGGAGGGGGGVREQDRFLPIANISRIMKKAIPANGKIAKDAKETVQECVSEFISFITSEASDKCQREKRKTINGDDLLWAMATLGFEDYIEPLKVYLQK  
YREMEGDKLTAKTGDGSIKKDALGHGGASSATQGMGQQGAYNQGMGYMQPQYHNGDISN

>PvNF-YB05

MSEAESAPETGGGSYGGKEQDRYLPIANIGRIMRRAVPENGGKIAKDAKESVQECVSEFISFITSEASDKCMKEKRKTINGEDLIWSMGTGFEYVEPLKHYLNLYRETEGDTKGSKSSD  
HTGKKEIVLNGEFGSSDSLHG

>PvNF-YB06

MPDSDNDSGGPSNAGGELSSPREQDRFLPIANVSRIMKKALPANAKISKDAKETVQECVSEFISFITGEASDKCQREKRKTINGDDLLWAMTTLGFEDYVEPLKHYLHKFREIEGERAA  
ASSGASGSAQAQQQGDVARGAANAAGYGAPGAGGMMMMMGQPMYGSPPQQQPPPPQQQQQHQQHMMAMGGRGGYGHQGGGGSSSSSGLGRQDRA

>PvNF-YB07

MPDSDNESGGPSNAEFSSPREQDRFLPIANVSRIMKKALPANAKISKDAKETVQECVSEFISFITGEASDKCQREKRKTINGDDLLWAMTTLGFEDYIEPLKLYLHKFRELEGEKVASGA  
AGSSGSASQPQRETTPSAHNGAAGAVGYGMYGAGAGAGGGSGMIMMMGQPMYGSPPGASGYPPPHHMMVMGAKGGAYGHGGGSSPSLSGLGRQDRL

>PvNF-YB08

MSENFNFTHFAQQRQPQNLSASGTTSKDDNSEAGHGNLLPIANVGRIMKEVLPPQAKISKRAKETIQECATEFVGFVTGEASERCRRERRKTINGDDICHAMRSLGLDHYADAMR  
RYLQRYRESEELTAALNSGGIQIDVRAELSIFRGDDEQRDRN

>PvNF-YB09

MADHHGQGGRRGGPGAEEIKEQDRLLPIANVGRIMKQILPPNAKISKEAKETMQECVSEFISFVTGEASDKCHKEKRKTVNGDDVCWAFGALGFDDYVDPMRRYLHKYRELEGDRA  
AAAASSRGGGGSTSTSAGPDAGAGAPSSGHFMFGAMDRSDNNSSSRPF

>PvNF-YB10

MADDGGSHEGGGGVREQDRFLPIANISRIMKKAIPANGKIAKDAKETLQECVSEFISFVTSEASDKCQKEKRKTINGDDLLWAMATLGFEEYVEPLKMYLHKYREMEGDSKLSKAG  
EGSVKKAISPFGGTSSSNQLVQHGVYNQGMGYMQPQYHNGDT

>PvNF-YB11

MDPASGFLPSGAANGTAAAGGGGQQHQAPPIREQDRMLQIANVIRIMRRVLP SHAKISDDAKETIQECVSEYISFITGEANERCQREQRKTITAEDVLWAMSRLGFDDYVEPLSVYLH  
RYREFEGEARGVVGLGVPGAARGGDHHHHPMALKSRAPGAMSPPHHDMQLHASMYGGPPAMP PPPGGPHGHGFVGMPPHHGGGGGGGGGHQSYPYEAAYAGEHAM  
AAYYGSAAAYGAPGSGSSGASRTPQGGSFHQHPFASYK

>PvNF-YB12

MDPASGFLPSGAANGTAAAGGGGQQQAPPIREQDRMLPIANVIRIMRRVLP SHAKISDDAKETIQECVSEYISFITGEANERCQREQRKTITAEDVLWAMSRLGFDDYVEPLSVYLHR  
YREFEGEARGVVGLGAPRGGDHHHHHSSMAPHHHDMQLHASMYGPPAVPPSGAPHHGHGLVSMPPHHGGGGHQYLPYPYEAAYGGEHAMAAYYGSAAAYGAPNGGSGDGSG  
GSASRTRQGGSFHQHPFASYK

>PvNF-YB13

MPDSDNDSGGPSNAGGELSSPREQDRFLPIANVSRIMKKALPANAKISKDAKETVQECVSEFISFITGEASDKCQREKRKTINGDDLLWAMTTLGFEDYVEPLKHYLHKFREIEGERAA  
ASSGASGSAQAQQQGDVARGATNAGGYAGYSAGGMMMMGQPMYGSPPQQQQQPPPPQQQHQQHMMAMGGRGGYGHQGGGGSSSSSGLGRQDRA

>PvNF-YB14

MSENFDFTFGAQQGQPQNLSRDDNSRAGHDNLLPIANVGRIMKDVLPQAKISKHAKETIQECATEFIGFVTGEASERCRRERRKTINGDDICHAMRSLGLDHYANAMRRYLQRY  
RESEELAAALNSGGGGIQIDVRAELSIFRGDEQQGKN

>PvNF-YB15

MADDGGSHEGGGGGGGVREQDRFLPIANISRIMKKAIPANGKIAKDAKETLQECVSEFISFVTSEASDKCQKEKRKTINGDDLLWAMATLGFEEYVEPLKMYLHKYREMEGDSKLSK  
KAGEGSKKAISPFGGTSSSNQLVQHGVYNQGMGYMQPQYHNGDT

>PvNF-YB16

MADAPASPGGGGGSHESGSPKGGGGGGGGGVREQDRFLPIANISRIMKKAIPANGKIAKDAKETVQECVSEFISFITSEASDKCQREKRKTINGDDLLWAMATLGFEDYIEPLKVYLQK  
YREMEGDKLTAKAGDGSIKKDALGHGGASSATQGMGQQGAYNQGMGYMQPQYHNGDISN

>PvNF-YB17

MSEAESAPETGGGSYGGKEQDRYLPIANIGRIMRRAVPDNGKIAKDAKESVQECVSEFISFITSEASDKCMKEKRKTINGDDLIWSLGTGFEYVEPLKHYLHKYREGDTKGSKSSDHT  
GKKEIVLIGEPGSSLDGV

>PvNF-YB18

MSTDPQGPKPWAPCAMAPERAAVAKEAMSTEPLVPGTEPVIRGQDRMLPVANVSRIMRHALPPHAKISDGAKEMIQDCVSEFISFVTGEANERCHTEHRKTVTAEDIVWAMNRLGF  
DDYIRPLNTFLQRMREIEGGDGAGGSGSGRGRSRRGSSLVALHGAQTMRPAYPDAPQGYAVRPVPRPVVPASNAVASRFGSRYQLPGGQRSMAPYGGAAAFRAGGNRGGFYGDEAS  
SSNEAPTARRARSRHY

>PvNF-YC01

MEPKSTTPPPAPVMGAPVAYPPPPAAAYAAGPYAHAPAAALYPPPPPPPPHPAAA AVQQQLGPAQQQLNLFWAEQFREVEATTD FKNHNLPLARIKKIMKADEDVRMIAAEAPV  
VFARACEMFILELTHRGWAHA EENKRRTLQKSDIAAAVARTEVDFLVDIVPRDEAKDAEADAAGMGAGIPHPAAGMPAADPMGYYYVQPQ

>PvNF-YC02

MDQYSQEINDDGATSGVTPGSYPLNTFLQPAALESVPLLSATAAFLPVPASQGAAYPATILSSFSNQSSQTNAFEAATNVAGGTPAAFALTPYNHQPEALASLPSSSAGTTRLPSA  
AGSSSSQVAGAGAAAYQASIPVPLSSQHQAALFQKFQQLQQHQLQYQEQLQALWTGQLVEAEQATDLKVHNLPLARIKKIMKADEDVKMIAAGEVPVLFKACEMFILELTRSWLH  
AEGAKRRRTLQRSDVASAIIANEMFDLMDVSPTEEQNGNGVAPPQQTATMPATFPIPFPMYANQQPVTFMWPPTEYQQPQQRQQQNSDGGQAE

>PvNF-YC03

MFWAEQYREIEATTD FKNHNLPLARIKKIMKADEDVRMIAAEAPVVFARACEMFILELTHRGWAHA EENKRRTLQKSDIAAAIARTEVDFLVDIVPRDDAKDADAAAAA  
AAGIPRPAAGVPATDPLAYYYVPQQ

>PvNF-YC04

MRQARPYSGMFCGGVSARTGPHALPLARIKKIMKRSAGETADGGARMISGEAPVVFSKACELFIAELTRRAWAATLEGKRRTVHKEDVATAVQKTDLDFLVDVVMADAGGGGHA  
AAGQYDDDDGALE

>PvNF-YC05

MDQYSRMINNDEGATSGVTPGSYPLTTYLQPAALESVPPSSAAGAAFLPVPASQGAASYPPATMLSSFSNQSSHTNAFQAATNVGTGTPAAFALTPYNHQPEALASVPPSSSAGSSFFL  
PPAAGSHGAGAAAYQASIPVPLSSQNQAALFQRFQQLQQHQQQYQQQLQALWTGQLVEAEQATDLKVHNLPLARIKKIMKADEDVKMIAAEVPVVFARACEMFILELTRSWLQAE  
WSKRRTLQRSDVAAAIIANEMFDLMDVSPTEEQNGGAPPQTATMPATFPMQHVPFPMYANQQPAASFMPWPPTEYQQQQQQRQQQNSDGRQAE

>PvNF-YC06

MEPKSTTPLPAPVMGAPVAYPPPPAAAYAAGPYAHAPAAALYPPPPPPPPHPAAA AVQQQLGPAQQQLNLFWAEQFREVEATTD FKNHNLPLARIKKIMKADEDVRMIAAEAPV  
VFARACEMFILELTHRGWAHA EENKRRTLQKSDIAAAVARTEVDFLVDIVPRDEAKDAEAAAAGMGAGIPHPAAGMPAADPMGYYYVQPQ

>PvNF-YC07

MEPSSQPQPVMGVATGGSQAYPAAAASYAPPAMVPGAPAVVPPGSQPAAPFANPAQLSAQHQM VYQQAQQFHQQLQQQQQQQLREFWTTQMDEIEQTTFKNHTLPLARIKKIMK  
ADEDVRMISAEAPVVFARACEMFILELTRSWMHTEENKRRTLQKNDIAAAITRTDIYDFLVDIIPRDEMKEEGLGLPRVGLPPAVGAPGDSYPPYYMTAQQMPPGGGMVYGGQQG  
HPVTYMWQQPQGHEEPPPEEQQQQRST

>PvNF-YC08

MDNQPLPYSTGQPPATGGAPVPGVPGAAGPPVPHHLLQQQQAQLQAFWAYQRQEAERASASDFKNHQLPLARIKKIMKADEDVRMISAEAPVLFARACELFILELTIRSWLHAE  
ENKRRTLQRNDVAAAARTDVFDFLVDIVPREEAKKEEPSALGFAAAAGAGAVGSGAAGGAPAAAGMPYYPPMGQPAPMMPAWHVPAPWPAWQQGAAADVDQSGSFGGEEGQG  
FAAGHGGGAASFPPAAPPSSSE

>PvNF-YC09

MEPSSQPQPVMGVATAGSQAYPAAAAYAPPAMVPGAPAVVPPGSQPAAPFPNPAQLSAQHQM VYQQAQQFHQQLQQQQQQQLREFWTTQMDEIEQTTFKNHTLPLARIKKIMK  
ADEDVRMISAEAPVVFARACEMFILELTRSWMHTEENKRRTLQKNDIAAAITRTDIYDFLVDIIPRDEMKEEGLGLQRVGLPPAVGAPGDSYPPYYMTAQQMPPGGGMIYGDQQG  
HPVTYMWQQPQQQDEEPPPEEQRQQRSTLK

>PvNF-YC10

MDNQPLPYSTGQPPATGGAPVPGVPGAAGPPVPHHLLQQQQAQLQAFWAYQRQEAERASASDFKNHQLPLARIKKIMKADEDVRMISAEAPVLFARACELFILELTIRSWLHAE  
ENKRRTLQRNDVAAAARTDVFDFLVDIVPREEAKKEEPSALGFAAAAGAGAVGGGAPGGAPAAAGMPYYPPMGQPAPMMPAWHVPAPWPAWQQGAAADVDQSGSFGGEEGQG  
FAGGHGGGAVSFPPAAPPSSSE

>PvNF-YC11

MEPTSQPQPAIGVVAYPPAATIISPSAVAAGLQPGQAFANPAQMSAQHQV VYQQAQQFHLQQLQQQQQRQLQQFQWAERLADIEQTTFKNHTLPLARIKKIMKADEDVRMISAEA  
PVVFARACEMFILELTRSWMHTEENKRRTLQKNDIAAAITRTDIYDFLVDIVPRDEMKEEGVGLPRAGLPPMGAPADAHPPYYMPQQQVPPGGGMVYGTQQGHPVTYWLQEPQEQQ  
EPPPEEQQLPGSG

>PvNF-YC12

MRQARPYSGIFCGGVSARTGPHALPLARIKKIMKRSAGETADGGARMISGEAPVVFSKACELFIAELTRRAWAATLEGKRRTVHKEDVATAVQKTDLDFLVDVVMADAGGGGHA  
AGQYDDDDGALE

>AtNF-YA01

MDKKVSFTSSVAHSTPPYLSTISWGLPTKSNVGTESLSLKVV DARPERLINTKNISFQDQDSSSTLSSAQSSNDVTSSGDDNPSRQISFLAHSVDVCKGFEETQRKRFAIKSGSSTAGIADIH  
SSPSKANFSFHYADPHFGGLMPAAYLPQATIWNQPMTRVPLPFDLIENEPVFNQKQFHAIMRRRQQRKLEAQNKLIKARKPYLHESRHVHALKRPRGSGGRFLNNTKQLQESTDPK  
QDMPIQQQHATGNMSRFVLYQLQNSNDCDCSTTSRSDITSASDSVNLFGHSEFLSDCPSQTNPTMYVHGQSNDMHGGRNTHHFSVHI

>AtNF-YA02

MTSSIHESLSDNIGSHEKQEQRDSHFQPPIPSARNYESIVTSLVYSDPGTTNSMAPGQYPYDPYYSIFAPPQPYTGLMGVQQQGVPLPSDAVEEPVFNQKQYHGILRRRQSRARLES  
QNKVIKSRKPYLHESRHLHAIRPRGCGGRFLNAKKEDEHHEDSSHEEKS NLSAGKSAMAASSGTS

>AtNF-YA03

MQVFQRKEDSSWGNSMPTTNSNIQSESESLTKDMIMSTTQLPAMKHSGLQLQNQDSTSSQSTEEESGGGEVASFGEYKRYGCSIVNNLSGYIENLGKPIENYTKSITTSSMVSQDSVF  
PAPTSGQISWLSLQCAETSHFNGLAPEYASTPTALPHLEMMGLVSSRVPLPHHIQENEPFVNAKQYHAILRRRKHRAKLEAQNKLIKCRKPYLHESRHLHALKRARGSGGRFLNNTKK  
LQESSNSLCSQMANGQNFMSPHGGGSGIGSSSISPSSNSNCINMFQNPQFRFSGYPSTHHASALMSGT

>AtNF-YA04

MMHQMLNKKDSATHSTLPYLNTSISWGVVPTDSVANRRGSAESLSLKVDSRPGHIQTTKQISFQDQDSSSTQSTGQSYTEVASSGDDNPSRQISFSAKSGSEITQRKGFASNPKQGSMTG  
FPNIHFAPAQANFSFHYADPHYGLLAATYLPQAPTCNPQMVMIPGRVPLPAELTETDPVFNQKQYHAIMRRRQQRKLEAQNKLIRARKPYLHESRHVHALKRPRGSGGRFLN  
TKKLLQESEQAAAAREQEQDKLGQQVNRKTNMSRFEAHMLQNNKDRSSTTSGSDITSVSDGADIFGHTEFQFSGFPTPINRAMLVHGQSNDMHGGMHGHFSVHI

>AtNF-YA05

MTSSVHELSDNNESHAKKERPDSQTRPQVPSGRSSESIDTNSVYSEPMAGHLYPYPDPYYSVFAQQAYLPHYPYGVQLQLMGMQQPGVPLQCDAVEEPVFNQKQYHGILRRRQSR  
AKLEARNRAIKAKKPYMHESRHLHAIRPRGCGGRFLNAKKENGHDHKEEEEATSDENTSEASSLRSEKLAMATSGPNGRS

>AtNF-YA06

MAMQTVREGLFSAPQTSWWTAFGSQPLAPESLAGSDSDFAGVKVGSVGETGQRVDKQNSATHLAFSLGDVKSPLRVPKPHGATFSMQSPCLELGFSPPIYTKYPYGEQQYYGVVS  
AYGSQSRVMLPLNMETEDSTIYVNSKQYHGIIRRRQSRAKAAAVLDQKKLSSRCRKPYPMHHSRHLHALRRRPRGSGGRFLNNTKSQNLNENSGTNAKKGDGSMQIQSQPKPQQSNSQNS  
EVVHPENGTMNLSNGLNVSGSEVTSMNYFLSSPVHSLGGMVMPKWIAAAAMDNGCCNFKT

>AtNF-YA07

MQEFHSSKDSLPCPATSWDNSVFTNSNVQSSSLTDNNTLSLTMEMKQTGFQMQHYDSSSTQSTGGESYSEVASLSEPTNRYGHNIVVTHLSGYKENPENPIGSHSISKVSQDSVVLPIE  
AASWPLHGNTVPHFNGFLSFPYASQHTVQHPQIRGLVPSRMPLPHNIPENEPFVNAKQYQAILRRRERRAKLEAQNKLIKVRKPYLHESRHLHALKRVRGSGGRFLNTKKHQESNSS  
LSPPFLIPPHVFKNSPGKFRQMDISRGGVVSSVSTTSCSDITGNNDMFMQONPQFRFSGYPSNHHVSVLM

>AtNF-YA08

MGIEDMHKSXSDSGGNKVDSEVHGTVSSINSLNLPWHRAAAACNANSSVEAGDKSSKSIALALESNGSKSPSNRDNTVNKESQVTTSPQSAGDYSDKNQESLHHGITQPPHPQLVGH  
TVGWASSNPYQDPYAGVMGAYGHHPLGFVYPYGGMPHSRMPLPEMAQEPVFNNAKQYQAILRRRQARAKAELEKLIKSRKPYLHESRHQHAMRRRPRGTGGRFAKKTNTEASK  
RKAEEKSNGHVTQSPSSNSDQGEAWNGDYRTPQGDEMSSAYKRREEGECGQQWNSLSSNHPSQARL

AIK

>AtNF-YA09

MQTEELLSPPQTPWWNAFGSQPLTTESLSGEASDSFTGVKAVTTEAEQGVVDKQTSTTLFTFSPGGEKSSRDVPKPHVAFAMQSACFEFGFAQPMMYTKHPHVEQYYGVVSAYGSQRS  
SGRVMIPKMETEEDGTIYVNSKQYHGIIRRRQSRAKAEKLSRCRKPYPMHHSRHLHAMRRRPRGSGGRFLNTKTADAQSKSPNSQSSEVFHPENETINSSREANESNLSDSAVTSMD  
YFLSSSAYSPGGMVMPKWNAAAMDIGCCKLNI

>AtNF-YA10

MQSKPGRENEEEVNNHHAVQQPMMYAEPWWKNNSFGVVPQARPSGIPSNSSSLDCPNGSESNDVHSASED GALNGENDGTWKDSQAATSSRSVDNHGMEGNDPALSIRNMHDQ  
PLVQPPPELVGHYIACVPNPYQDPYGGMLMGAYGHQQLGFRPYLGMPTRETAALPDMAQEPVYVNAKQYEGILRRRKARAKAELEKRVIRDRKPYLHESRHKHAMRRRARASGGRFA  
KKSEVEAGEDAGGRDRERGSATNSSGSEQVETDSNETLNSGAP

>AtNF-YB01

MTDEDRLPLIANVGRMLKQILPSNAKISKEAKQTVQECATEFISFVTCEASEKCHRENKRVNGDDIWWALSTLGLDNYADAVGRHLHKEYEAERERTEHNKGSNDSGNEKETNTRS  
DVQNQSTKfirVVEKGSSSAR

>AtNF-YB02

MERGAPFSHYQLPKSISELNDQHSNNPTMTSSVVVAGAGDKNNGIVVQQPPCVAREQDQYMPIANVIRIMRKTLP SHAKISDDAKETIQECVSEYISFVTGEANERCQREQRKTTT  
AEDILWAMSKLGFNDYVDPLTVFINRYREIETDRGSALRGEPPSLRQTYGGNGIGFHPGSHGLPPPYPYGYGMLDQSMVMGGGGRYYQNGSSGQDESSVGGGSSSSINGMPAFDHYGQ  
YK

>AtNF-YB03

MTEESPEEDHGSPGVAETNPGSPSKTNNNNNNNKEQDRFLPIANVGRIMKKVLPNGKISKDAKETVQECVSEFISFVTGEASDKCQREKRKTINGDDIIWAITTLGFEDYVAPLKVY  
LCKYRDTEGEKVNNSPKQQQRQQQQIQQNNHHNYQFQEQQNNNNMSCTSYISHHHSPFLPVDHQPPNIAFSPKSLQKQFPQQHDNNIDSIHW

>AtNF-YB04

MAESQAKSPGGCGSHESGGDQSPRSLHVREQDRFLPIANISRIMKRGLPANGKIAKDAKEIVQECVSEFISFVTSEASDKCQREKRKTINGDDLLWAMATLGFEDYMEPLKVYLMRYRE  
MEGDTKGSAGKGGDPNAKKGQSSQNGQFSQLAHQGPYGNSSQAQQHMMVPMPTD

>AtNF-YB05

MAESQAKSPGGCGSHESGGDQSPRSLHVREQDRFLPIANISRIMKRGLPANGKIAKDAKEIVQECVSEFISFVTSEASDKCQREKRKTINGDDLLWAMATLGFEDYMEPLKVYLMRYRE  
MEGDTKGSAGKGGDPNAKKGQSSQNGQFSQLAHQGPYGNSSQAQQHMMVPMPTD

>AtNF-YB06

MAESQAKSPGGCGSHESGGDQSPRSLHVREQDRFLPIANISRIMKRGLPANGKIAKDAKEIVQECVSEFISFVTSEASDKCQREKRKTINGDDLLWAMATLGFEDYMEPLKVYLMRYRE  
MEGDTKGSAGKGGDPNAKKGQSSQNGQFSQLAHQGPYGNSSQAQQHMMVPMPTD

>AtNF-YB07

MADTPSSPAGDGGESGGSVREQDRFLPIANISRIMKALPPNGKIGKDAKDTVQECVSEFISFITSEASDKCQKEKRKTVNGDDLLWAMATLGFEDYLEPLKIYLARYRELEGDNKGSG  
KSGDGSNRDAGGGVSGEEMPSW

>AtNF-YB08

MAGNYHSFQNPPIRYQNYNFGSSSNHQHEHDGLVVVEDQQQEESMMVKEQDRLLPIANVGRIMKNILPANAKVSKEAKETMQECVSEFISFVTGEASDKCHKEKRKTVNGDDIC  
WAMANLGFDDYAAQLKKYLHRYRVLEGEKPNHHGKGGPKSSPDN

>AtNF-YB09

MAESQTGGGGGSHESGGDQSPRSLNVREQDRFLPIANISRIMKRGLPLNGKIAKDAKETMQECVSEFISFVTSEASDKCQREKRKTINGDDLLWAMATLGFEDYIDPLKVYLMRYRE  
MEGDTKGSAGKGGESSAKRDGQPSQVSQF5QVPQQGFSQGPYGNSSQGSNMMVQMPGTE

>AtNF-YB10

MADSDNDSGGHKDGGNASTREQDRFLPIANVSRIKALPANAKISKDAKETVQECVSEFISFITGEASDKCQREKRKTINGDDLLWAMATLGFEDYVEPLKVYLQKYREVEGEKTTT  
AGRQGDKEGGGGGGAGSGGGAPMYGGGMVTTMGHQFHHFS

>AtNF-YB11

MDPMDIVGKSKEDASLPKATMTKIIKEMLPADVVRVARDAQDLLIECCVEFINLISSESNEVCNKEDKRTIAPEHVLKALQVLGFGEYVEEVYAAEQHKYETMQDSQRSVKMNSGAE  
MTEEEAAAEQQRMFARARMNGGVTVPQPEQLEEPQQQQTSLQS

>AtNF-YB12

MDPMDIVGKSKEDASLPKATMTKIIKEMLPDVVRVARDAQDLLIECCVEFINLVSSSENDCNKEDKRTIAPEHVLKALQVLGFGEYIEEVYAAEQHKYETMQDTQRSVKWNPGAQ  
MTEEEAAAEQQRMFARARMNGGVSVPQPEHPETDQRSPQS

>AtNF-YB13

MGDSDRDSGGGQNGNNQNGQSSLSPREQDRFLPIANVSRIKALPANAKISKDAKETMQECVSEFISFVTGEASDKCQKEKRKTINGDDLLWAMATLGFEDYVEPLKVYLQRFREIE  
GERTGLGRPQTGGEVGEHQDRAVDGGGFYGGGGMQYHQHQLHQNNHMYGATGGGSDSGGGAASGRTRT

>AtNF-YB14

MERGGFHGYRKLVSNNTPSPPLAANFLMAEGSMRPPFNPKNKTSNGGEECTVREQDRFMPIANVIRIMRRILPAHAKISDDSKETIQECVSEYISFITGEANERCQREQRKTTITAE  
DVLWAMSKLGFDDYIEPLTLYLHRYRELEGERGVSCSAGSVSMTNGLVVKRPNGTMTEYGAYGPVPGIHMAQYHYRHQNGFVFCNEPNSKMSGSSGASGARVEVFPTQQHKY

>AtNF-YC01

MVSSKPKKEKKARSVVVNKASGRSKRSSGSRKTSNKVNIVKKKPEIYEISESSSDSVEEAIRGDEAKKSNVGVSKRGNGKSVGIPKTSKNREEDDGGAEADAKIKFPMNRRIRMR  
SDNSAPQIMQDAVFLVNKATEMFIERFSEEAYDSSVKDKKKFIHYKHLSSVVSNDQRYEFLADSVPEKLAEEAALEEWERGMDTAG

>AtNF-YC02

MDQQDHGQSGAMNYGTNPYQTNPMSTTAATVAGGAAQPGQLAFHQIHQQQQQQQLAQQLQAFWENQFKEIEKTTDFKNHSLPLARIKKIMKADEDVRMISAEAPVVFARACE  
MFILELTLRSWNHTEENKRRTLQKNDIAAAVTRTDIFDFLVDIVPREDLRDEVLSIPRGTVPEAAAAGYPYGYLPAGTAPIGNPGMVMGNPGGAYPPNPYMGQPMWQQQAPDQPD  
QEN

>AtNF-YC03

MDQQGQSSAMNYGSNPYQTNAMTTTTPTGSDHPAYHQIHQQQQQQQLTQQLQSFWETQFKEIEKTTDFKNHSLPLARIKKIMKADEDVRMISAEAPVVFARACEMFILELTLRSWNHT  
EENKRRTLQKNDIAAAVTRTDIFDFLVDIVPREDLRDEVLLGGVGAEATAAGYPYGYLPPGTAPIGNPGMVMGNPGAYPPNPYMGQPMWQQPGPEQQDPDN

>AtNF-YC04

MEQSEEGQQQQQGVMDYVPPHAYQSGPVNAASHMAFQQAHHFHQQQQQQQLQMFWANQMQEIEHTTDFKNHTLPLARIKKIMKADEDVRMISAEAPVIFAKACEMFIL  
ELTLRAWIHTEENKRRTLQKNDIAAAISRTDVFDFLVDIIPRDELKEEGLGVTGKTIPSVVGSPPYYLQQQGMQHWPQEHPDES

>AtNF-YC05

MDTNNQQPPPSAAGIPPPPGTTISAAGGGASYHLLQQQQQLQLFWTYQRQEIEQVNDFKNHQLPLARIKKIMKADEDVRMISAEAPILFAKACELFILELTIRSWLHAEENKRRT  
LQKNDIAAAITRTDIFDFLVDIVPRDEIKDEAAVLGGGMVVAPTASGVPPYPPMGQPAGPGGMMIGRPAMPDNGVYVQPPSQAWQSVWQTSTGTGDDVSYGSGSSGQGNLDGQ  
G

>AtNF-YC06

MENNNGNLPPKGNELKSFWSKEMEGNLDKFNHDLPIRIKKIMKYDPDVTMIASEAPILLSKACEMFIMDLTMRSWLHAQESKRVTLQKSNVDAAVAQTVIFDFLLDDIEVK  
RESVAAAADPVAMPIDGELPPGMVIGTPVCCSLGIHQFPQMQAWPGAWTSVSGEEEEARGKKGDDGN

>AtNF-YC07

MRRPKSSHVRMEPVAPRSHNTMPMLDQFRSNHPETSKIEGVSSLDTALKVFWNNQREQLGNFAGQTHLPLSRVRKILKSDPEVKKISCDVPALFSKACEYFILEVTLRAWMHTQSTR  
ETIRRCDFQAVKNSGTDFLIDRVFPGPHCVTHQGVQPPAEMILPDMNVPIDMDQIEEENMMEERSVGFDLNCDLQ

>AtNF-YC08

MEEEGSIRPEFPGRVKKIMKLDKDKINSEALHVITYSTELFLHFLAEKSAVVTAEKKRKTVNLDHLRIAVKRHQPTSDFLDLSLPLPAQPVKHTKSVSDKKIPAPPIGTRRIDDFFSK  
KAKTDSA

>AtNF-YC09

MEENNGNHNHYLPQPSSQLPPPPLYYSMPLPSYSLPLPYSQMRNYWIAQMGNATDVKHHAFPLTRIKKIMKSNPEVNMVTAEPVLISKACEMLILDLTMRSLHTVEGGRQTL  
KRSIDLTRSDISAATTRSFKFTFLGDVVRPDSVVTDDPVLHPDGEVLPVGTIVIGYPVFDGNGVYASPPQMQEWPVAVPGDGEAAAGEIGSSGGN

>AtNF-YC10

MAENNNNGDNMNNNDNHQQPPSYSQPPMASSNPQLRNYWIEQMETVSDFKNRQLPLARIKKIMKADPDVHMVSAEAPIIFAKACEMFIVDLTMRSWLKAEENKRHTLQKSDIS  
NAVASSFTYDFLLDVVPKDESIATADPGFVAMPHPDGGGVPQYYPPGVVMGTPMVGSGMYAPSQAWPAAAGDGEDDAEDNGGNGGN

>AtNF-YC11

MENNNNHQQPPKDNELKSFWSKMEGDLNVKNHEFPISRIKRIMKFDPDVSMIAAEAPNLLSKACEMFVMDLTMRSLHAQESNRLTIRKSDVDVAVVSQTVIFDFLRDDVPKD  
EGEPVAAAADPVDDVADHVAVPDLNNEELPPGTIVIGTPVCYGLGIHAPHPQMPGAWTEEDATGANGGNGGN

>AtNF-YC12

MDNNNNNNNQPPPTSVPYPPGSAVTTVIPPPPSGSASIVTGGGATYHLLQQQQQLQMFWTYQRQEIEQVNDFKNHQLPLARIKKIMKADEDVRMISAEAPILFAKACELFILELT  
RSWLHAEENKRRTLQKNDIAAAITRTDIFDFLVDIVPREEIKEEDAASALGGGMVAPASGVPPYPPMGQPAVPGGMMIGRPAMPDPSGVYAQPPSQAWQSVWQNSAGGDDV  
SYGSGSSGHGNLDSQG
